# Supplementary material for: Preparation and Application of High Internal Phase Pickering Emulsion Gels Stabilized by Starch Nanocrystal/Tannic Acid Complex Particles
Source: MDPI journal article supplement (doi:10.3390/gels10050335), 2024-05-15
Supplement: s1 [file s1]

# Preparation and Application of High Internal Phase Pickering Emulsion Gels Stabilized by Starch Nanocrystal/Tannic Acid Complex Particles

Haoran Jin <sup>1,†</sup>, Chen Li <sup>1,2,†</sup>, Yajuan Sun <sup>1,\*</sup>, Bingtian Zhao <sup>1</sup> and Yunxing Li <sup>1,\*</sup>

<sup>1</sup> Key Laboratory of Synthetic and Biological Colloids, Ministry of Education, School of Chemical and Material Engineering, Jiangnan University, Wuxi 214122, China; btzhao@jiangnan.edu.cn (B.Z.)

<sup>2</sup> School of Chemistry, Biology and Environment, Yuxi Normal University, Yuxi 653100, China

\* Correspondence: cmsun@jiangnan.edu.cn (Y.S.); yunxingli@jiangnan.edu.cn (Y.L.)

† These authors contribute equally to this work.

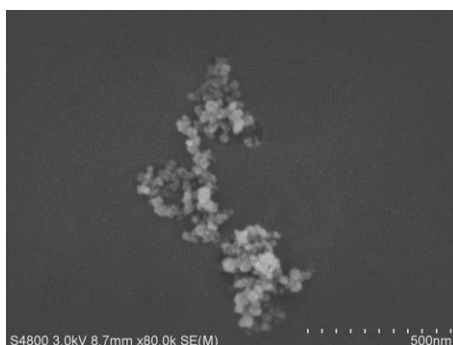

Figure S1. SEM image of the starch nanocrystals prepared with acid hydrolysis.

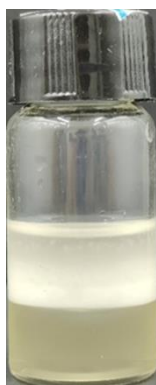

Figure S2. Macroscopic photograph of a freshly prepared emulsion using TA as a stabilizer.
